# Supplementary material for: Positive Feedbacks Enhance Macroalgal Resilience on Degraded Coral Reefs
Source: PubMed Central journal article supplement (PMC4871466; doi:10.1371/journal.pone.0155049), 2016-05-17
Supplement: pone.0155049.s001.pdf [file pone.0155049.s001.pdf]

1 SUPPLEMENTARY INFO

2

3 Sample Collection for Microsatellite Analysis

4 In May 2013, the uppermost three leaves of 50 *S. polycystum* ramets were collected from the  
5 MPAs and non-MPAs in Votua and Vatu-o-lailai (Fig. 1), maintaining a minimum distance  
6 of 3 metres between each sample to reduce the possibility of sampling clones. Samples were  
7 collected a minimum of ~40m from the boundaries of the MPA and non-MPA borders to  
8 avoid edge effects. To minimize potential differences in physical conditions, collecting sites  
9 in the MPA and non-MPA areas were chosen to have comparable depth and distance from  
10 shore. Samples were shaken to remove particulates and preserved in molecular grade ethanol,  
11 which was replaced after the first 48 hours.

12

13 DNA Extraction, Amplification & Analysis

14 DNA was isolated from 2-3mm<sup>2</sup> of between 29-43 *S. polycystum* samples per site using  
15 DNeasy Blood & Tissue Kit (Qiagen, The Netherlands) and purified with DNA, RNA &  
16 Protein Purification kit (Macherey-Nagel, Germany). All polymerase chain reactions (PCR)  
17 were run on an Eppendorf AG Thermal Cycler with a total volume of 10µL which contained:  
18 6.8 µL DI water; 1 µL 10x PCR buffer; 1µL diluted DNA; 0.2µL of each dNTP, forward  
19 primer, reverse primer and GO Taq polymerase buffer (5u/µL Promega) and 0.4 µL MgCl<sub>2</sub>  
20 (25mM, Thermo Scientific; except primer 38 which contained 0.8µL MgCl<sub>2</sub>). Primer 9 was  
21 amplified with the following profile: initial denaturation at 95°C for 2 minutes; 45 cycles of  
22 95°C for 30 seconds, 48°C for 1 minute and 72°C for 1 minute; followed by a final extension  
23 at 72°C for 6 minutes. All other primers were amplified with the following profile:  
24 denaturation at 95°C for 2 minutes, followed by 40 cycles of 95°C for 30 seconds, 50°C for 1  
25 minute and 72°C for 1 minute. PCR products were analysed by Nevada Genomics (Applied

26 Biosystems Prism 3730 DNA Analyser; University of Nevada, Reno) using GeneScan 500  
 27 LIZ size standard (Applied Biosystems, USA) and read using Peak Scanner Software 2  
 28 (Applied Biosystems, USA).

29

30 Table S1: Microsatellite Primer Sequences: Sequences and Fst values for the five  
 31 microsatellite loci. Fst was not estimable for locus 42 as there was no allelic variation at that  
 32 locus.

| Primer | Forward Sequence              | Reverse Sequence              | Fst   |
|--------|-------------------------------|-------------------------------|-------|
| 1      | AGG CAA GCA ACA AAC GAG<br>TT | CAG GAT TGC AAC CAT ACC<br>CG | 0.049 |
| 9      | AGGACGGGAAAAGGGAATAG          | AGTTTCGGAAAGCGTTCTCA          | -0.01 |
| 24     | ATG GGC AGT GGG TAG ACA<br>AT | GAT TGG TTT GAC AGA GCC<br>GG | 0.002 |
| 38     | CCA ACA ACC ACT GAT GTC CC    | ACC CGG CTC TGT CAA ACT<br>AA | 0.001 |
| 42     | CAA CTC GCC CTG TCA AAC TA    | TAG TCG TCA CCC TTT CCG G     | -     |

33

34

35
